# Supplementary material for: Long intergenic non-coding RNA LINC00485 exerts tumor-suppressive activity by regulating miR-581/EDEM1 axis in colorectal cancer
Source: publisher site journal article supplement (doi:10.18632/aging.202354), 2021-01-10
Supplement: Supplementary file [file aging-v13i3-202354-supplementary-material-SD1.pdf]

SUPPLEMENTARY FIGURES

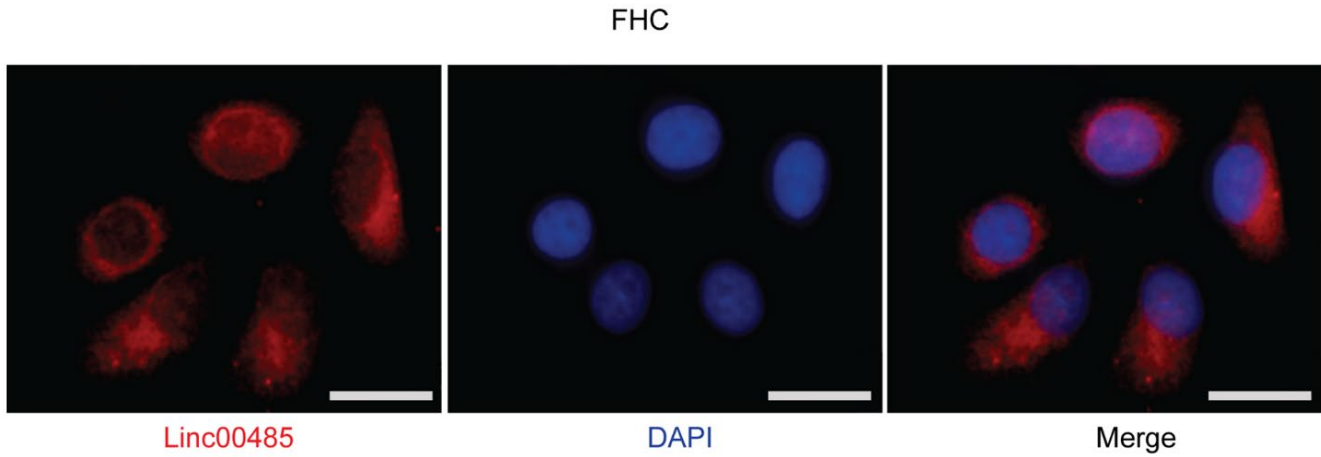

**Supplementary Figure 1.** The cellular localization of Linc00485 in FHC cell. FISH assay indicates that Linc00485 is mainly localized in the cytoplasm of FHC cells. Scale bar, 2  $\mu$ m.

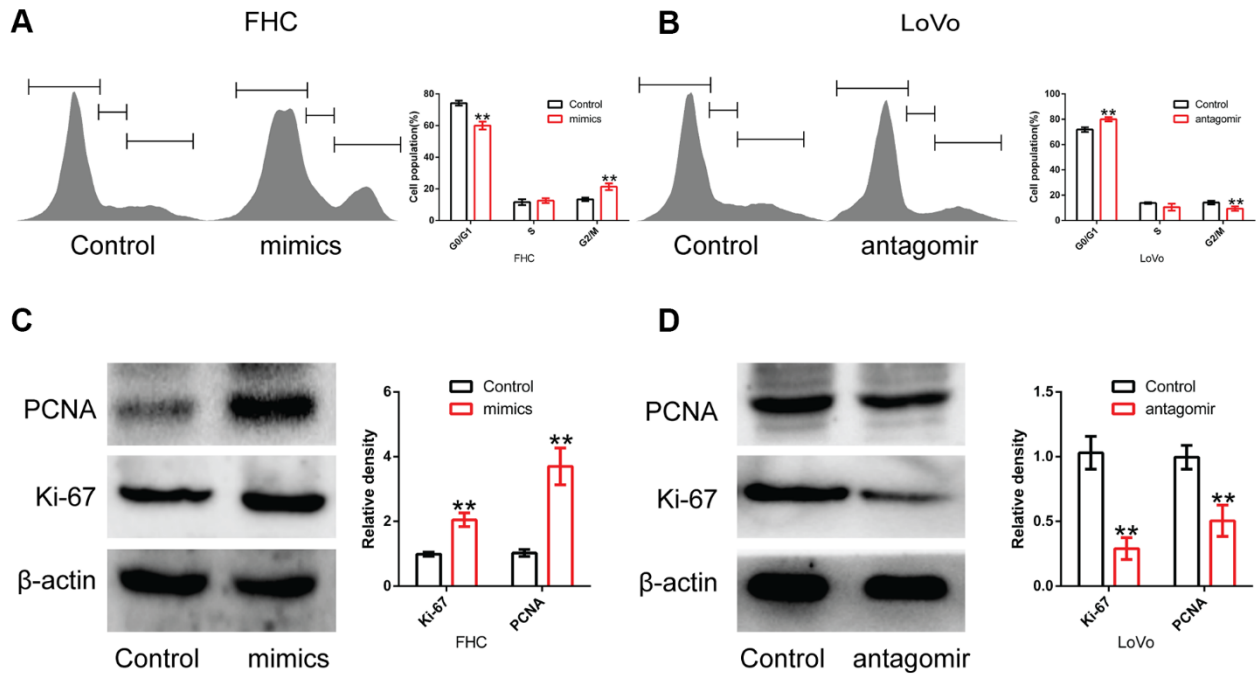

**Supplementary Figure 2.** The effects of miR-581 mimics/antagomir transfection on FHC or LoVo cells. (A) After transfection with miR-581 mimics, the cell cycle was arrested in G0/G1 phase in FHC cells. (B) After transfection with miR-581 antagomir, the cell cycle was arrested in G0/G1 phase in LoVo cells. (C) The overexpression of miR-581 up-regulated the protein expression levels of Ki-67 and PCNA in FHC cells. (D) miR-581 knockdown down-regulated the protein expression levels of Ki-67 and PCNA in LoVo cells. Data were analyzed using Student's test. Bars were represented as S.D.  $**P < 0.01$ . PCNA, proliferating cell nuclear antigen.

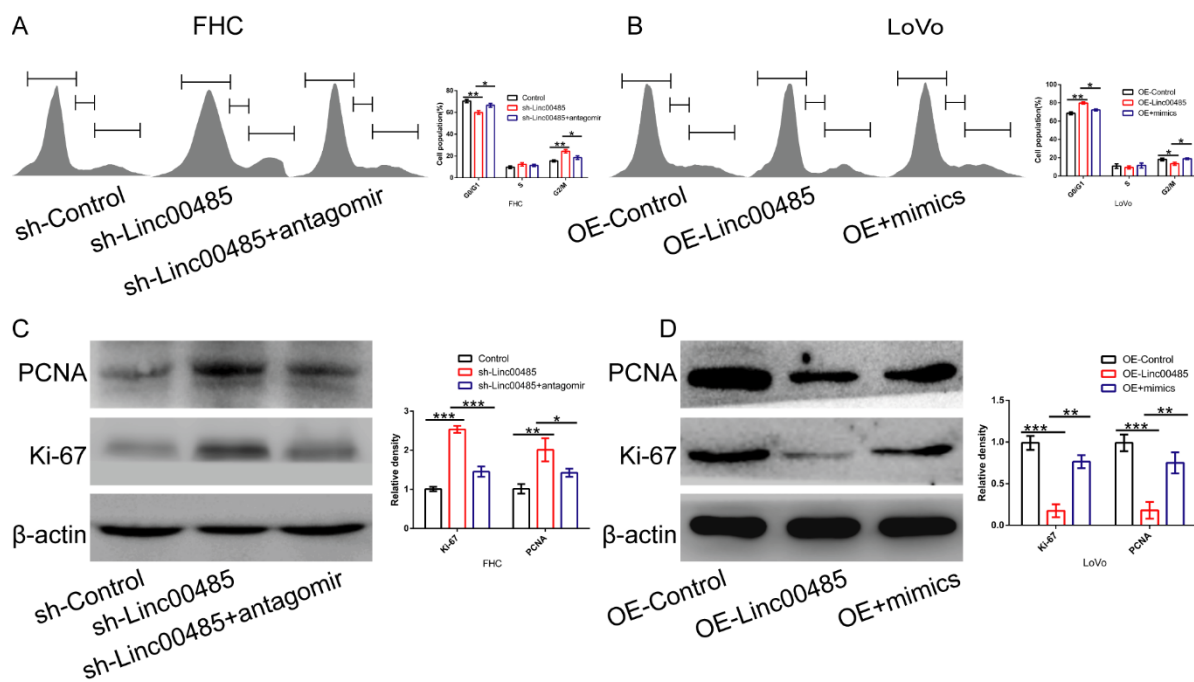

**Supplementary Figure 3. Linc01088/miR-581 axis regulates cell cycle and the expression of proliferative indexes PCNA and Ki-67.** (A, B) Cell cycle of (A) LINC00485 silenced FHC cells with or without miR-581 antagomir treatment for 24 h and (B) LINC00485-overexpressed LoVo cells with or without miR-581 mimics treatment for 24 h was measured by the Flow Cytometry. (C, D) The protein expression levels of PNCA and Ki-67 in (C) LINC00485 silenced FHC cells with or without miR-581 antagomir treatment for 24 h and (D) LINC00485-overexpressed LoVo cells with or without miR-581 mimics treatment for 24 h were detected by Western blotting assays. Data was analyzed using the one-way ANOVA with LSD test. Bars were represented as S.D. \* $P < 0.05$ ; \*\* $P < 0.01$ ; \*\*\* $P < 0.001$ . PCNA, proliferating cell nuclear antigen; sh, short hairpin RNA targeting LINC00485; OE, overexpression.

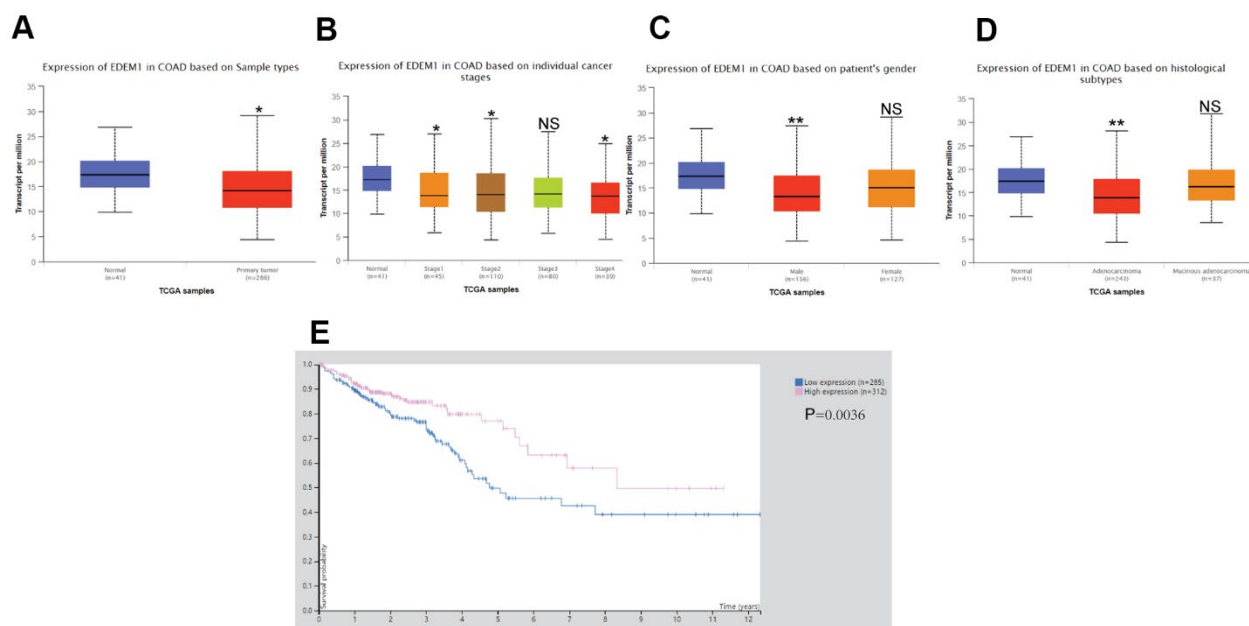

**Supplementary Figure 4. The relationship of EDEM1 expression with clinical parameters of COAD patients in TCGA and HAP databases.** Expression of EDEM1 in patients with COAD based on (A) sample types, (B) individual cancer stages, (C) patient's gender and (D) histological subtypes. (E) Low expression of EDEM1 predicted a poor prognosis of CRC patients. COAD, colon adenocarcinoma. \* $P < 0.05$ ; \*\* $P < 0.01$ ; NS, not significant.
